# Supplementary material
Source: HighWire-hosted journal article supplement (http://www.cmaj.ca/highwire/filestream/68011/field_highwire_adjunct_files/1/170088-res-2-at.pdf)
Supplement: 170088-res-2-at.pdf [file 170088-res-2-at.pdf]

## Appendix 2 (as supplied by the authors): Variables of interest

| Source                                                                  | Variables                                                                                                                                                                                                                                                                                                                                                                                                                                                              |
|-------------------------------------------------------------------------|------------------------------------------------------------------------------------------------------------------------------------------------------------------------------------------------------------------------------------------------------------------------------------------------------------------------------------------------------------------------------------------------------------------------------------------------------------------------|
| Coroner -Sociodemographic variables                                     | Marital status, weeks gestation, delivery date, weeks postpartum, combined suicide/homicide (child) and method of suicide.                                                                                                                                                                                                                                                                                                                                             |
| Institute for Clinical Evaluative Sciences – Sociodemographic variables | Maternal age at suicide, gestational weeks/weeks postpartum at time of suicide, neighborhood income (classified into quintiles), community size, health region (Ontario's 14 Local Health Integration Networks, LHINs).                                                                                                                                                                                                                                                |
| Institute for Clinical Evaluative Sciences – Clinical variables         | Number of psychiatric hospital admissions in the previous 3 years and history of self-harm/suicide attempts within 1 and 3 years preceding suicide <sup>1</sup> . Type of psychiatric morbidity based on diagnostic codes in the 5 years preceding suicide. Prior medical morbidity using the number of major aggregated diagnosis groups (ADGs) from John Hopkins ACG <sup>2</sup> system in the 3 years preceding suicide, and excluding the major psychosocial ADGs |

## References

1. Bethell J, Rhodes AE. Identifying deliberate self-harm in emergency department data. *Health Rep* 2009;20:35-42.
2. Weiner J, editor. The Johns Hopkins ACG case-mix system documentation & application manual version 5.0. Baltimore: Johns Hopkins University School of Public Health; 2001.
